# Enzyme promiscuity shapes evolutionary innovation and optimization

Gabriela I. Guzmán<sup>a</sup>, Troy E. Sandberg<sup>a</sup>, Ryan A. LaCroix<sup>a</sup>, Ákos Nyerges<sup>b</sup>, Henrietta Papp<sup>b</sup>, Markus de Raad<sup>c</sup>, Zachary A. King<sup>a</sup>, Trent R. Northen<sup>c</sup>, Richard A. Notebaart<sup>d</sup>, Csaba Pál<sup>b</sup>, Bernhard O. Palsson<sup>a,e,f</sup>, Balázs Papp<sup>b</sup>, \*Adam M. Feist<sup>a,e</sup>

<sup>a</sup>*Department of Bioengineering, University of California, San Diego, La Jolla, CA, 92093, United States.*

<sup>b</sup>*Synthetic and Systems Biology Unit, Institute of Biochemistry, Biological Research Centre of the Hungarian Academy of Sciences, Szeged, Hungary H-6726.*

<sup>c</sup>*Environmental Genomics and Systems Biology Division, Lawrence Berkeley National Laboratory, Berkeley, CA 94720, United States.*

<sup>d</sup>*Laboratory of Food Microbiology, Wageningen University and Research, Wageningen, The Netherlands.*

<sup>e</sup>*Novo Nordisk Foundation Center for Biosustainability, Technical University of Denmark, Lyngby, Denmark.*

<sup>f</sup>*Department of Pediatrics, University of California, San Diego, La Jolla, CA, 92093, United States.*

---

## Abstract

Evidence suggests that novel enzyme functions evolved from low-level promiscuous activities in ancestral enzymes. Yet, the evolutionary dynamics and physiological mechanisms of how such side activities contribute to systems-level adaptations are poorly understood. Furthermore, it remains untested whether knowledge of an organism's promiscuous reaction set ('underground metabolism') can aid in forecasting the genetic basis of metabolic adaptations. Here, we employ a computational model of underground metabolism and laboratory evolution experiments to examine the role of enzyme promiscuity in the acquisition and optimization of growth on predicted non-native substrates in *E. coli* K-12 MG1655. After as few as 20 generations, the evolving populations repeatedly acquired the capacity to grow on five predicted novel substrates—D-lyxose, D-2-deoxyribose, D-arabinose, m-tartrate,

---

*Email address: afeist@ucsd.edu* (\*Adam M. Feist)

and monomethyl succinate—none of which could support growth in wild-type cells. Promiscuous enzyme activities played key roles in multiple phases of adaptation. Altered promiscuous activities not only established novel high-efficiency pathways, but also suppressed undesirable metabolic routes. Further, structural mutations shifted enzyme substrate turnover rates towards the new substrate while retaining a preference for the primary substrate. Finally, genes underlying the phenotypic innovations were accurately predicted by genome-scale model simulations of metabolism with enzyme promiscuity. Computational approaches will be essential to synthesize the complex role of promiscuous activities in applied biotechnology and in models of evolutionary adaptation.

*Keywords:* adaptive evolution, enzyme promiscuity, systems biology, genome-scale modeling

---

## 1. Introduction

Understanding how novel metabolic pathways arise during adaptation to environmental changes remains a central issue in evolutionary biology. The prevailing view is that enzymes often display promiscuous (i.e., side or secondary) activities and evolution takes advantage of such pre-existing weak activities to generate metabolic novelties[1, 2, 3, 4, 5, 6, 7, 8, 9]. However, it remains poorly explored how and at what evolutionary stages enzyme side activities contribute to environmental adaptations. Do genetic elements associated with promiscuous activities mutate mostly in the initial ‘innovation’ stage of adaptation when the population acquires the ability to grow on a new nutrient source[9, 10] (i.e., innovation) or do they also contribute to improving fitness in subsequent stages (i.e., optimization)[11]? Innovations have been linked to beneficial mutations that endow an organism with novel capabilities such as the ability to use a new carbon source and expand into a new ecological niche[11, 12]. This is distinct from optimizations associated with mutations that improve upon the initial innovation. It is often observed that the mutations accrued within this optimization phase produce gradual benefits in fitness[11]. Typically, enzyme promiscuity has been linked to the innovation phase, for which mutations enhancing secondary activities may result in dramatic phenotypic improvements[2, 11]. In this work, we demonstrate that enzyme promiscuity can be linked to fitness benefits in both the innovation and optimization stages of adaptive evolution.

23 A second open question in understanding the role of enzyme promiscuity  
24 in adaptation concerns our ability to predict the future evolution of broad ge-  
25 netic and phenotypic changes[13, 14]. There has been an increasing interest  
26 in studying empirical fitness landscapes to assess the predictability of evolu-  
27 tionary routes[15, 16]. However, these approaches assess predictability only  
28 in retrospect and there is a need for computational frameworks that forecast  
29 the specific genes that accumulate mutations based on mechanistic knowl-  
30 edge of the evolving trait. A recent study suggested that a detailed knowl-  
31 edge of an organisms promiscuous reaction set (the so-called ‘underground  
32 metabolism’[17]) enables the computational prediction of genes that confer  
33 new metabolic capabilities when artificially overexpressed[4]. However, it re-  
34 mains unclear whether this approach could predict evolution in a population  
35 of cells adapting to a new nutrient environment through spontaneous muta-  
36 tions. First, phenotypes conferred by artificial overexpression might not be  
37 accessible through single mutations arising spontaneously. Second, and more  
38 fundamentally, mutations in distinct genes may lead to the same phenotype.  
39 Such alternative mutational trajectories may render genetic evolution largely  
40 unpredictable. Furthermore, computational approaches can aid in predicting  
41 and discovering overlapping physiological functions of enzymes [15, 18], but  
42 these have also yet to be explored in the context of adaptation. In this study,  
43 we address these issues by performing controlled laboratory evolution exper-  
44 iments to adapt *E. coli* to predicted novel carbon sources and by monitoring  
45 the temporal dynamics of adaptive mutations.

## 46 2. Results and Discussion

### 47 2.1. Computational prediction and experimental evolution of non-native car- 48 bon source utilizations

49 To test our ability to predict evolutionary adaptation to novel (non-  
50 native) carbon sources based on our knowledge of underground metabolism,  
51 we utilized a comprehensive network reconstruction of underground metabolism[4].  
52 This network reconstrucion was previously shown to correctly predict growth  
53 on non-native carbon sources if a given enabling gene was artificially over-  
54 expressed in a growth screen[4]. By adding the set of underground reactions  
55 to the comprehensive metabolic reconstruction for *E. coli* K-12 MG1655,  
56 *iJO1366*[19], we employed the constraint-based modeling framework to iden-  
57 tify carbon sources where the native *E. coli* metabolic network was unable  
58 to grow, but addition of a single underground reaction predicted growth.

59 Based on this computational procedure, we selected eight carbon sources  
60 that cannot be utilized by wild-type *E. coli* MG1655 (Table S1).

61 Next, we initiated laboratory evolution experiments to adapt *E. coli* to  
62 these non-native carbon sources to examine the validity of the computational  
63 predictions. Adaptive laboratory evolution experiments were conducted in  
64 two distinct phases: first, an ‘innovation’[9, 10] stage during which cells  
65 acquired mutations to grow on the non-native carbon sources and, second,  
66 an ‘optimization’[11] stage during which a strong pressure was placed to  
67 select for the fastest growing cells on the novel carbon sources (Figure 1A).

68 During the initial innovation stage of laboratory evolution experiments  
69 (Figure 1A, see *SI Materials and Methods*), *E. coli* was successfully adapted  
70 to grow on five non-native substrates. Duplicate laboratory evolution ex-  
71 periments were conducted in batch growth conditions and in parallel on an  
72 automated adaptive laboratory evolution (ALE) platform using a protocol  
73 that uniquely selected for adaptation to conditions where the ancestor (i.e.,  
74 wild-type) was unable to grow (Fig. 1A)[20]. In the innovation phase, *E. coli*  
75 was weaned off of a growth-supporting nutrient (glycerol) onto the novel sub-  
76 strates (Fig. 1A, Table S2). A description of the complex passage protocol  
77 is given in the Figure 1 legend and expanded in the methods for both phases  
78 of the evolution. This procedure successfully adapted *E. coli* to grow on five  
79 out of eight non-native substrates, specifically, D-lyxose, D-2-deoxyribose, D-  
80 arabinose, m-tartrate, and monomethyl succinate. Unsuccessful cases could  
81 be attributed to various experimental and biological factors such as exper-  
82 imental duration limitations, the requirement of multiple mutation events,  
83 or stepwise adaptation events, as observed in an evolving *E. coli* to utilize  
84 ethylene glycol [21].

## 85 2.2. *Underground metabolism accurately predicted the genes mutated during* 86 *innovation*

87 To analyze the mutations underlying the nutrient utilizations, clones were  
88 isolated and sequenced shortly after an innovative growth phenotype was  
89 achieved and mutations were identified (see Methods) and analyzed for their  
90 associated causality (Fig. 1B, Fig. S1, Dataset S1). Strong signs of par-  
91 allel evolution were observed at the level of mutated genes in the replicate  
92 evolution experiments. Such parallelism provided evidence of the beneficial  
93 nature of the observed mutations and is a prerequisite for predicting the  
94 genetic basis of adaptation[22]. Mutations detected in the evolved isolated

95 clones for each experiment demonstrated a striking agreement with such pre-  
96 dicted ‘underground’ utilization pathways[4]. Specifically, for four out of the  
97 five different substrate conditions, key mutations were linked to the predicted  
98 enzyme with promiscuous activity, which would be highly unlikely by chance  
99 ( $P < 10^{-8}$ , Fishers exact test), (Table 1, Fig. S2). Not only were the specific  
100 genes (or their direct regulatory elements) mutated in four out of five cases,  
101 but few additional mutations (0-2 per strain, Dataset S1) were observed in  
102 the initial innovation phase, indicating that the innovations required a small  
103 number mutational steps to activate the predicted growth phenotype and the  
104 method utilized was highly selective. For the one case where the prediction  
105 and observed mutations did not align, D-arabinose, a detailed inspection of  
106 the literature revealed existing evidence that three *fuc* operon associated en-  
107 zymes can metabolize D-arabinose—FucI, FucK, and FucA [23]. In this case,  
108 the modeling approach could not make the correct prediction because the  
109 promiscuous (underground) reaction database was incomplete.

110 In general, key innovative mutations could be categorized as regulatory  
111 (R) or structural (S) (Table 1). Of the fifteen mutation events outlined  
112 in Table 1, eleven were categorized as regulatory (observed in all five suc-  
113 cessful substrate conditions) and four were categorized as structural (three  
114 of five successful substrate conditions). For D-lyxose, D-2-deoxyribose, and  
115 m-tartrate evolution experiments, mutations were observed within the cod-  
116 ing regions of the predicted genes, namely *yihS*, *rbsK*, and *dmlA* (Table  
117 1, Figs. S3-S5). Regulatory mutations, occurring in transcriptional regu-  
118 lators or within intergenic regions—likely affecting sigma factor binding and  
119 transcription of the predicted gene target—were observed for D-lyxose, D-  
120 2-deoxyribose, m-tartrate, and monomethyl succinate (Table 1). Observing  
121 more regulatory mutations is broadly consistent with previous reports[10, 24].  
122 The regulatory mutations were believed to increase the expression of the  
123 target enzyme, thereby increasing the dose of the typically low-level side  
124 activity[18]. This observation is consistent with ‘gene sharing’ models of  
125 promiscuity and adaptation where diverging mutations that alter enzyme  
126 specificity are not necessary to acquire the growth innovation[18, 25]. Fur-  
127 thermore, although enzyme dosage could also be increased through dupli-  
128 cation of genomic segments, this scenario was not commonly observed dur-  
129 ing the innovation phase of our experiments. Two large duplication events  
130 (containing 165 genes (*yqiG-yhcE*) and 262 genes (*yhiS-rbsK*), respectively)  
131 were observed only in the innovation phase adaption for growth on D-2-  
132 deoxyribose, and these regions did include the *rbsK* gene with the under-

133 ground activity predicted to support growth (Table 1).

134 To identify the mutations that were causally involved in the nutrient uti-  
135 lization phenotypes, we re-introduced each key mutation (Table 1) into the  
136 ancestor wild-type strain using the genome engineering method (pORTMAGE)[26].  
137 Genome editing was performed for screening mutation causality[27] on all  
138 novel substrate conditions, except for monomethyl succinate, which only con-  
139 tained a single mutation (Table 1). Furthermore, the large duplication in the  
140 D-2-deoxyribose strain could not be reconstructed using this method due to  
141 the limitations of the method. Individual mutants were isolated after pORT-  
142 MAGE reconstruction, and their growth was monitored on the innovative  
143 growth medium over the course of one week. The growth test revealed that  
144 single mutations were sufficient for growth on D-lyxose, D-arabinose, and  
145 m-tartrate, but with varying lengths of time for growth to be detected de-  
146 pending on the mutation present (Table S3). For example, in the case of  
147 D-lyxose, growth was detected in YihW  $\Delta$ 2bp mutant cells in approximately  
148 3-4 days, compared to 5-7 days for YihS single mutation cells. Interestingly,  
149 in the case of D-2-deoxyribose, an individual mutation (either the N20Y rbsK  
150 or the  $\Delta$ rbsR mutation) was not sufficient for growth, thereby suggesting  
151 that the mechanism of adaptation to this substrate is more complex, requir-  
152 ing multiple mutation events (in this case, both regulatory and structural  
153 mutations). Overall, these causality assessments support the notion that  
154 underground activities open short adaptive paths towards novel phenotypes.

155 Were the mutations observed in our laboratory experiment relevant for  
156 environmental adaptations in the wild? The N20Y sole mutation observed  
157 in the RbsK enzyme during the evolution on D-2-deoxyribose served as a  
158 case study. Previous work has found that predominantly intestinal and ex-  
159 traintestinal strains of *E. coli*, as well as some *Salmonella* species, can use  
160 D-2-deoxyribose as a sole carbon source as they possess a pathogenicity is-  
161 land containing the deoxyribokinase deoK[28, 29, 30], which shares a 36%  
162 sequence identity with *rbsK* (BLASTp [31] expect (E) value  $4e-29$ ). Specifi-  
163 cally, four such reported pathogenic strains in this set (three *E. coli* and one  
164 *Salmonella*)[28, 29, 30] were shown to grow on D-2-deoxyribose and possess a  
165 deoxyribokinase (DeoK) with a tyrosine residue at the equivalent N20Y posi-  
166 tion (Fig. S4). This information suggests that the N20Y mutation may have  
167 improved the ribokinase underground activity of RbsK in the mutant strain  
168 evolved here on D-2-deoxyribose and enabled growth in this environment  
169 similar to the capabilities of the strains that possess the DeoK enzyme (see  
170 Fig. S5 for a structural comparison). Therefore, this case highlighted that

171 the genetic basis of adaptation observed in the laboratory is indeed relevant  
172 to evolution in the wild.

173 *2.3. Contribution of enzyme side activities to the optimization phase of adap-*  
174 *tation*

175 Once the roles of mutations acquired during the innovation phase were es-  
176 tablished, adaptive mechanisms required for optimizing or fine-tuning growth  
177 on the novel carbon sources were explored. Specifically, of major inter-  
178 est for this study was the role of enzyme promiscuity during this second  
179 ‘optimization’[11] phase of the evolutions. Analysis of mutations in the opti-  
180 mization phase led to identification of additional promiscuous enzyme activi-  
181 ties, above and beyond the innovative mechanisms, impacting the phenotypes  
182 of the evolved strains in four of the five nutrient conditions (Table 2). Dis-  
183 covery of these optimizing activities was driven by a systems-level analysis  
184 consisting of mutation, enzyme activity, and transcriptome analyses coupled  
185 with computational modeling of optimized growth states on the novel carbon  
186 sources.

187 The ‘optimization’ phase of the evolution experiments consisted of serially  
188 passing cultures in the early exponential phase of growth in order to select  
189 for cells with the highest growth rates (Fig. 1A). Marked and repeatable in-  
190 creases in growth rates on the non-native carbon sources was observed in as  
191 few as 180-420 generations (Table S1). Whole genome sequencing of clones  
192 was performed at each distinct growth-rate ‘jump’ or plateau during the opti-  
193 mization phase (see arrows in Fig. 1B, Fig. S1). Such plateaus represent re-  
194 gions where a causal mutation has fixed in a population[20]. Out of the total  
195 set of 41 mutations identified in the growth optimization regimes (Datasets  
196 S1, S2), a subset (Table 2) was explored. This subset consisted of genes which  
197 were repeatedly mutated in replicate experiments or across all endpoint se-  
198 quencing data on a given carbon source. To unveil the potential mechanisms  
199 for improving growth on the non-native substrates, the transcriptome of ini-  
200 tial and endpoint populations (right after the innovation phase and at the  
201 end of the optimization phase, respectively) was analyzed using RNAseq.  
202 Differentially expressed genes were compared to genes containing optimizing  
203 mutations (or their direct targets) and targeted gene deletion studies were  
204 performed. Additionally, for the D-lyxose experiments, enzyme activity was  
205 analyzed to determine the effect of a structural mutations acquired in a key  
206 enzyme during growth optimization.

207 Several mutations acquired during the optimization phase leading to large  
208 gains in fitness were directly linked to the influence of enzyme promiscuity.  
209 A clear example of optimizing mutations involved with optimization were  
210 those acquired during the D-lyxose experiments that were linked to enhanc-  
211 ing the secondary activity of YihS, the enzyme also involved in the initial  
212 innovation. Protein structural mutations were observed beyond those ob-  
213 served during after the initial innovation. Structural mutations are believed  
214 to improve the enzyme side activity to achieve the optimization, and this  
215 effect was experimentally verified. The effects of structural mutations on  
216 enzyme activity were examined for the YihS isomerase enzyme that was mu-  
217 tated during the D-lyxose evolution (Fig. 1B, Table 1). The activities of the  
218 wild-type YihS and three mutant YihS enzymes (YihS R315S, YihS V314L  
219 + R315C, and YihS V314L + R315S) were tested in vitro. A cell-free in vitro  
220 transcription and translation system[32, 33] was used to express the enzymes  
221 and examine conversions of D-mannose to D-fructose (a primary activity[34])  
222 and D-lyxose to D-xylulose (side activity) (Fig. 2A, Fig. S6). The ratios of  
223 the turnover rates of D-lyxose to the turnover rates of D-mannose were cal-  
224 culated and compared (Fig. 2B). The double mutant YihS enzymes showed  
225 approximately a ten-fold increase in turnover ratio of D-lyxose to D-mannose  
226 compared to wild type ( $P < 0.0003$ , ANCOVA). These results suggest that  
227 the mutations indeed shifted the affinity towards the innovative substrate  
228 (enzyme side activity), while still retaining an overall preference for the pri-  
229 mary substrate, D-mannose (ratio  $< 1$ ). This is in agreement with ‘weak  
230 trade-off’ theories of the evolvability of promiscuous functions[2] in that only  
231 a small number of mutations could result in significant improvements in the  
232 promiscuous activity of an enzyme without greatly affecting the primary ac-  
233 tivity.

234 Another clear example of an important optimizing mutation was found  
235 in the D-arabinose experiments occurring in the *araC* gene, a DNA-binding  
236 transcriptional regulator that regulates the *araBAD* operon involving genes  
237 associated with L-arabinose metabolism[35]. Based on structural analysis  
238 of AraC (Fig. 3A), the mutations observed in the two independent parallel  
239 experiments likely affect substrate binding regions given their proximity to  
240 a bound L-arabinose molecule (RCSB Protein Data Bank entry 2ARC)[36],  
241 possibly increasing its affinity for D-arabinose. Expression analysis revealed  
242 that the *araBAD* transcription unit associated with AraC regulation[37] was  
243 the most highly up-regulated set of genes (expression fold increase ranging  
244 from approximately 45-65X for Exp 1 and 140-200X for Exp 2,  $P < 10^{-4}$ )



245 in both experiments (Fig. 3B). Further examination of these up-regulated  
246 genes revealed that the ribulokinase (AraB) has a similar  $k_{cat}$  on four 2-  
247 ketopentoses (D/L- ribulose and D/L- xylulose)[38] despite the fact that  
248 *araB* is consistently annotated to only act on L-ribulose (EcoCyc)[39] or L-  
249 ribulose and D/L-xylulose (BiGG Models)[40]. It was thus reasoned that  
250 AraB was catalyzing the conversion of D-ribulose to D-ribulose 5-phosphate  
251 in an alternate pathway for metabolizing D-arabinose (Fig. 3C) and this was  
252 further explored.

253 The role of the proposed second pathway in optimizing growth on D-  
254 arabinose was analyzed both computationally and experimentally. A flux  
255 balance analysis simulation of a model without the *FucK* associated ribulok-  
256 inase reaction (the pathway of D-arabinose metabolism associated with inno-  
257 vative mutations), but with a non-zero flux through the AraB underground  
258 reaction, predicted in an approximately 10% higher simulated growth rate  
259 compared to when AraB is inactive (Fig. S7). This signaled the possibility  
260 of a growth advantage for using the *araB* enabled pathway and thus was  
261 explored experimentally. Experimental growth rate measurements of clones  
262 carrying either the *fucK* or *araBAD* genes knockouts showed that the *FucK*  
263 enzyme activity was essential for growth on D-arabinose for all strains ana-  
264 lyzed (innovative and optimized) (Fig. 3D, Table S4). However, removal of  
265 *araB* from optimized endpoint strains reduced the growth rate of the strain  
266 to the approximate growth rate of the initial innovative strain (Fig. 3D),  
267 suggesting that the proposed *araB* encoded pathway (Fig. 3C) was respon-  
268 sible for enhancing the growth rate and therefore qualifies as fitness opti-  
269 mization. Putting this in the context of previous work, a similar pathway  
270 has been described in mutant *Klebsiella aerogens* W70 strains[41]. In the  
271 1977 study, it was suggested that the D-ribulose-5-phosphate pathway (i.e.,  
272 the *araB* pathway) is more efficient for metabolizing D-arabinose than the  
273 D-ribulose-1-phosphate pathway (i.e., the *fucK* pathway), possibly because  
274 the L-fucose enzymatic pathway requires that three enzymes recognize sec-  
275 ondary substrates[41]. This conclusion supports the role of the optimization  
276 mutations observed here in *araC*. Overall, underground activities of both the  
277 *fuc* operon (innovative mutations) and *ara* operon (optimizing mutations)  
278 encoded enzymes were important for the adaptation to efficiently metabo-  
279 lize D-arabinose and the *ara* mutated operon did not solely support growth.  
280 Furthermore, computational analyses suggest that a similar mechanism of  
281 amplification of growth-enhancing promiscuous activities played a role in the  
282 m-tartrate optimization regime. Similarly, both independent evolutions on

283 m-tartrate possessed a mutation in the predicted transcription factor, *ygbI*,  
284 with a resulting overexpression of a set of genes with likely promiscuous ac-  
285 tivity (*Supporting Text*, Fig. S8). Two additional proposed mechanisms for  
286 growth optimization on m-tartrate and D-lyxose were related to the primary  
287 activities of *pyrE* and *xylB* and are discussed in the *Supporting Text* (Fig.  
288 S8 and Fig. S10).

#### 289 *2.4. Loss of an enzyme side activity improves fitness*

290 Analysis of the D-2-deoxyribose adaptation revealed a conceptually novel  
291 way by which alterations in promiscuous enzyme activities contribute to  
292 growth optimization. Several lines of observation suggested that suppres-  
293 sion of a side reaction of aldehyde dehydrogenase A (AldA) enhanced growth  
294 on this novel carbon source. The optimizing mutation event in the D-2-  
295 deoxyribose evolution was a large deletion event spanning 171 genes (Fig.  
296 S9). Of these, the metabolic gene that was most significantly expressed in  
297 the ancestor (i.e., before the large deletion) was *aldA* (Fig. 4A). AldA has  
298 been described as a broad substrate specificity enzyme and has shown cat-  
299 alytic activity on acetaldehyde[42]. Turning to computational modeling to  
300 understand the impact of an active AldA, showed that forcing increased flux  
301 through acetaldehyde to acetate conversion decreased the overall growth rate  
302 (Fig. 4B, C; Dataset S3). Together, these findings indicate that the large  
303 deletion event observed in the D-2-deoxyribose endpoint selected against the  
304 AldA side activity, leading to improved growth. This scenario suggests that  
305 not only enhancement, but also suppression of side reactions can play a piv-  
306 otal role in adaptation to novel environments.

### 307 **3. Conclusions**

308 Taken together, the results of this combined computational analysis and  
309 laboratory evolution study show that enzyme promiscuity is prevalent in  
310 metabolism and plays a major role in both phenotypic innovation and op-  
311 timization during adaptation. It was demonstrated that enzyme side activ-  
312 ities can confer a fitness benefit in two distinct ways. First, side activities  
313 contributed to the establishment of novel metabolic routes that enabled or  
314 improved the utilization of a new nutrient source. Second, suppression of an  
315 undesirable underground activity that diverted flux from a newly established  
316 pathway conferred a fitness benefit.

317 The results of this study have direct relevance for understanding the role  
318 of promiscuous enzymatic activities in evolution and for utilizing computa-  
319 tional models to predict the trajectory and outcome of molecular evolution[14,  
320 43]. Here, it was demonstrated that computational metabolic network mod-  
321 els which include the repertoire of enzyme side activities made it possible  
322 to predict the genetic basis of adaptation to novel carbon sources. As such,  
323 systems models and analyses are likely to contribute significantly towards  
324 representing the complex implications of promiscuity in theoretical models  
325 of molecular evolution[43]. Furthermore, the evolution of new gene functions  
326 from secondary promiscuous activities has been proposed by multiple models  
327 assuming functional gene divergence from a common ancestor following gene  
328 duplication events[44, 45, 46, 7, 47, 48] and the findings and strains from  
329 this study are relevant towards better understanding such models. Finally,  
330 the computational and subsequent approaches developed in this work can  
331 be leveraged to understand promiscuous activity in engineered strains for  
332 industrial biotechnology and in the adaptation of pathogenic microbes.

#### 333 4. Materials and Methods

334 Flux balance analysis and sampling *in silico* methods utilized in this work  
335 are described in *SI Materials and Methods*. Detailed information regard-  
336 ing the laboratory evolution experiments, growth media composition, and  
337 whole genome sequencing and mutation analysis is provided in *SI Materials*  
338 *and Methods*. Furthermore, details regarding the pORTMAGE library con-  
339 struction and mutant isolation as well as the cell-free *in vitro* transcription,  
340 translation enzyme activity characterizations performed are also provided in  
341 *SI Materials and Methods*. Experimental methods utilized to analyze opti-  
342 mization regime mechanisms of adaptation including RNA sequencing, phage  
343 transduction mutagenesis, and individual mutant growth characterizations  
344 are included in *SI Materials and Methods*. The RNAseq data is available  
345 in the Gene Expression Omnibus (GEO) database under the accession num-  
346 ber GSE114358. Data analysis, computation, and statistical analysis, un-  
347 less otherwise specified in *SI Materials and Methods*, were conducted using  
348 the scientific computing Python library SciPy (<http://www.scipy.org/>) in a  
349 Jupyter Notebook (<http://jupyter.org/>).

## 350 **5. Acknowledgments**

351 We would like to thank Richard Szubin and Ying Hefner for assistance  
352 with strain resequencing and P1-phage transduction mutagenesis, as well as  
353 Elizabeth Brunk for helpful discussion. We also thank Suzanne Kosina for  
354 her assistance with LC-MS experiments. We also thank Samira Dahesh and  
355 the Nizet Lab for their assistance with Bioscreen experiments. This work  
356 was partially supported by The Novo Nordisk Foundation Grant Number  
357 NNF10CC1016517. TRN and MDR acknowledge funding from ENIGMA-  
358 Ecosystems and Networks Integrated with Genes and Molecular Assemblies  
359 (<http://enigma.lbl.gov>), a Scientific Focus Area Program at Lawrence Berke-  
360 ley National Laboratory is based upon work supported by the U.S. Depart-  
361 ment of Energy, Office of Science, Office of Biological & Environmental Re-  
362 search under contract number DE-AC02-05CH11231. AN was supported by  
363 a PhD fellowship from the Boehringer Ingelheim Fonds. CP and BP acknowl-  
364 edge funding from the ‘Lendlet’ Programme of the Hungarian Academy of  
365 Sciences, The Wellcome Trust and GINOP-2.3.2-15-2016-00014 (EVOMER).  
366 CP was also supported by the European Research Council (H2020-ERC-2014-  
367 CoG).

## 368 **6. Author Contributions**

369 GIG, TES, RAL, TRN, RAN, CP, BP, BOP, and AMF designed the  
370 research; GIG, TES, RAL, ZAK, AN, HP, and MdR performed research;  
371 GIG, TES, ZAK, AN, MdR, BP, and AMF analyzed data; and GIG, BP,  
372 and AMF wrote the paper.

## 373 **7. Declaration of Interests**

374 The authors declare no competing interests.

## 375 **8. References**

- 376 [1] R. A. Jensen, Enzyme recruitment in evolution of new function, *Annu.*  
377 *Rev. Microbiol.* 30 (1976) 409–425.
- 378 [2] O. Khersonsky, D. S. Tawfik, Enzyme promiscuity: a mechanistic and  
379 evolutionary perspective, *Annu. Rev. Biochem.* 79 (2010) 471–505.

- 380 [3] H. Nam, N. E. Lewis, J. A. Lerman, D.-H. Lee, R. L. Chang, D. Kim,  
381 B. O. Palsson, Network context and selection in the evolution to enzyme  
382 specificity, *Science* 337 (2012) 1101–1104.
- 383 [4] R. A. Notebaart, B. Szappanos, B. Kintsés, F. Pál, Á. Györkei, B. Bo-  
384 gos, V. Lázár, R. Spohn, B. Csörgő, A. Wagner, E. Ruppín, C. Pál,  
385 B. Papp, Network-level architecture and the evolutionary potential of  
386 underground metabolism, *Proc. Natl. Acad. Sci. U. S. A.* 111 (2014)  
387 11762–11767.
- 388 [5] R. Huang, F. Hippauf, D. Rohrbeck, M. Haustein, K. Wenke, J. Feike,  
389 N. Sorrelle, B. Piechulla, T. J. Barkman, Enzyme functional evolution  
390 through improved catalysis of ancestrally nonpreferred substrates, *Proc.*  
391 *Natl. Acad. Sci. U. S. A.* 109 (2012) 2966–2971.
- 392 [6] K. Voordeckers, C. A. Brown, K. Vanneste, E. van der Zande, A. Voet,  
393 S. Maere, K. J. Verstrepen, Reconstruction of ancestral metabolic en-  
394 zymes reveals molecular mechanisms underlying evolutionary innovation  
395 through gene duplication, *PLoS Biol.* 10 (2012) e1001446.
- 396 [7] J. Näsval, L. Sun, J. R. Roth, D. I. Andersson, Real-time evolution  
397 of new genes by innovation, amplification, and divergence, *Science* 338  
398 (2012) 384–387.
- 399 [8] S. Schmidt, S. Sunyaev, P. Bork, T. Dandekar, Metabolites: a helping  
400 hand for pathway evolution?, *Trends Biochem. Sci.* 28 (2003) 336–341.
- 401 [9] S. D. Copley, Evolution of a metabolic pathway for degradation of a  
402 toxic xenobiotic: the patchwork approach, *Trends Biochem. Sci.* 25  
403 (2000) 261–265.
- 404 [10] R. Mortlock, *Microorganisms as Model Systems for Studying Evolution*,  
405 Springer Science & Business Media, 2013.
- 406 [11] J. E. Barrick, R. E. Lenski, Genome dynamics during experimental  
407 evolution, *Nat. Rev. Genet.* 14 (2013) 827–839.
- 408 [12] A. Wagner, *The Origins of Evolutionary Innovations: A Theory of*  
409 *Transformative Change in Living Systems*, OUP Oxford, 2011.

- 410 [13] M. Lässig, V. Mustonen, A. M. Walczak, Predicting evolution, *Nat Ecol*  
411 *Evol* 1 (2017) 77.
- 412 [14] B. Papp, R. A. Notebaart, C. Pál, Systems-biology approaches for pre-  
413 dicting genomic evolution, *Nat. Rev. Genet.* 12 (2011) 591–602.
- 414 [15] R. A. Notebaart, B. Kintsès, A. M. Feist, B. Papp, Underground  
415 metabolism: network-level perspective and biotechnological potential,  
416 *Curr. Opin. Biotechnol.* 49 (2018) 108–114.
- 417 [16] J. A. G. M. de Visser, J. Krug, Empirical fitness landscapes and the  
418 predictability of evolution, *Nat. Rev. Genet.* 15 (2014) 480–490.
- 419 [17] R. D’Ari, J. Casadesús, Underground metabolism, *Bioessays* 20 (1998)  
420 181–186.
- 421 [18] G. I. Guzmán, J. Utrilla, S. Nurk, E. Brunk, J. M. Monk, A. Ebrahim,  
422 B. O. Palsson, A. M. Feist, Model-driven discovery of underground  
423 metabolic functions in *escherichia coli*, *Proc. Natl. Acad. Sci. U. S. A.*  
424 112 (2015) 929–934.
- 425 [19] J. D. Orth, T. M. Conrad, J. Na, J. A. Lerman, H. Nam, A. M. Feist,  
426 B. Ø. Palsson, A comprehensive genome-scale reconstruction of *es-*  
427 *cherichia coli* metabolism—2011, *Mol. Syst. Biol.* 7 (2011) 535.
- 428 [20] R. A. LaCroix, T. E. Sandberg, E. J. O’Brien, J. Utrilla, A. Ebrahim,  
429 G. I. Guzman, R. Szubin, B. O. Palsson, A. M. Feist, Use of adaptive  
430 laboratory evolution to discover key mutations enabling rapid growth  
431 of *escherichia coli* K-12 MG1655 on glucose minimal medium, *Appl.*  
432 *Environ. Microbiol.* 81 (2015) 17–30.
- 433 [21] B. Szappanos, J. Fritzemeier, B. Csörgő, V. Lázár, X. Lu, G. Fekete,  
434 B. Bálint, R. Herczeg, I. Nagy, R. A. Notebaart, M. J. Lercher, C. Pál,  
435 B. Papp, Adaptive evolution of complex innovations through stepwise  
436 metabolic niche expansion, *Nat. Commun.* 7 (2016) 11607.
- 437 [22] S. F. Bailey, N. Rodrigue, R. Kassen, The effect of selection environment  
438 on the probability of parallel evolution, *Mol. Biol. Evol.* 32 (2015) 1436–  
439 1448.

- 440 [23] D. J. LeBlanc, R. P. Mortlock, Metabolism of d-arabinose: origin of a  
441 d-ribulokinase activity in escherichia coli, *J. Bacteriol.* 106 (1971) 82–89.
- 442 [24] M. Toll-Riera, A. San Millan, A. Wagner, R. C. MacLean, The genomic  
443 basis of evolutionary innovation in pseudomonas aeruginosa, *PLoS*  
444 *Genet.* 12 (2016) e1006005.
- 445 [25] J. Piatigorsky, W. E. O’Brien, B. L. Norman, K. Kalumuck, G. J. Wis-  
446 tow, T. Borrás, J. M. Nickerson, E. F. Wawrousek, Gene sharing by  
447 delta-crystallin and argininosuccinate lyase, *Proc. Natl. Acad. Sci. U.*  
448 *S. A.* 85 (1988) 3479–3483.
- 449 [26] Á. Nyerges, B. Csörgő, I. Nagy, B. Bálint, P. Bihari, V. Lázár, G. Apjok,  
450 K. Umenhoffer, B. Bogos, G. Pósfai, C. Pál, A highly precise and  
451 portable genome engineering method allows comparison of mutational  
452 effects across bacterial species, *Proc. Natl. Acad. Sci. U. S. A.* 113 (2016)  
453 2502–2507.
- 454 [27] C. D. Herring, A. Raghunathan, C. Honisch, T. Patel, M. K. Applebee,  
455 A. R. Joyce, T. J. Albert, F. R. Blattner, D. van den Boom, C. R.  
456 Cantor, B. Ø. Palsson, Comparative genome sequencing of escherichia  
457 coli allows observation of bacterial evolution on a laboratory timescale,  
458 *Nat. Genet.* 38 (2006) 1406–1412.
- 459 [28] C. Bernier-Fébreau, L. du Merle, E. Turlin, V. Labas, J. Ordonez, A.-  
460 M. Gilles, C. Le Bouguénec\*, Use of deoxyribose by intestinal and ex-  
461 traintestinal pathogenic escherichia coli strains: a metabolic adaptation  
462 involved in competitiveness, *Infect. Immun.* 72 (2004) 7381–7381.
- 463 [29] J. M. Monk, P. Charusanti, R. K. Aziz, J. A. Lerman, N. Premyodhin,  
464 J. D. Orth, A. M. Feist, B. Ø. Palsson, Genome-scale metabolic re-  
465 constructions of multiple escherichia coli strains highlight strain-specific  
466 adaptations to nutritional environments, *Proc. Natl. Acad. Sci. U. S. A.*  
467 110 (2013) 20338–20343.
- 468 [30] L. Tourneux, N. Bucurenci, C. Saveanu, P. A. Kaminski, M. Bouzon,  
469 E. Pistotnik, A. Namane, P. Marlière, O. Bârză, I. Li De La Sierra,  
470 J. Neuhaard, A. M. Gilles, Genetic and biochemical characterization  
471 of salmonella enterica serovar typhi deoxyribokinase, *J. Bacteriol.* 182  
472 (2000) 869–873.

- 473 [31] S. F. Altschul, T. L. Madden, A. A. Schäffer, J. Zhang, Z. Zhang,  
474 W. Miller, D. J. Lipman, Gapped BLAST and PSI-BLAST: a new  
475 generation of protein database search programs, *Nucleic Acids Res.* 25  
476 (1997) 3389–3402.
- 477 [32] Y. Shimizu, A. Inoue, Y. Tomari, T. Suzuki, T. Yokogawa, K. Nishikawa,  
478 T. Ueda, Cell-free translation reconstituted with purified components,  
479 *Nat. Biotechnol.* 19 (2001) 751–755.
- 480 [33] M. d. Raad, C. Modavi, D. J. Sukovich, J. C. Anderson, Observing  
481 biosynthetic activity utilizing next generation sequencing and the DNA  
482 linked enzyme coupled assay, *ACS Chem. Biol.* 12 (2017) 191–199.
- 483 [34] T. Itoh, B. Mikami, W. Hashimoto, K. Murata, Crystal structure of  
484 YihS in complex with d-mannose: structural annotation of escherichia  
485 coli and salmonella enterica yihs-encoded proteins to an aldose-ketose  
486 isomerase, *J. Mol. Biol.* 377 (2008) 1443–1459.
- 487 [35] S. A. Bustos, R. F. Schleif, Functional domains of the AraC protein,  
488 *Proc. Natl. Acad. Sci. U. S. A.* 90 (1993) 5638–5642.
- 489 [36] S. M. Soisson, B. MacDougall-Shackleton, R. Schleif, C. Wolberger,  
490 Structural basis for ligand-regulated oligomerization of AraC, *Science*  
491 276 (1997) 421–425.
- 492 [37] S. Gama-Castro, H. Salgado, A. Santos-Zavaleta, D. Ledezma-  
493 Tejeida, L. Muñoz-Rascado, J. S. García-Sotelo, K. Alquicira-  
494 Hernández, I. Martínez-Flores, L. Pannier, J. A. Castro-Mondragón,  
495 A. Medina-Rivera, H. Solano-Lira, C. Bonavides-Martínez, E. Pérez-  
496 Rueda, S. Alquicira-Hernández, L. Porrón-Sotelo, A. López-Fuentes,  
497 A. Hernández-Koutoucheva, V. Del Moral-Chávez, F. Rinaldi,  
498 J. Collado-Vides, RegulonDB version 9.0: high-level integration of gene  
499 regulation, coexpression, motif clustering and beyond, *Nucleic Acids*  
500 *Res.* 44 (2016) D133–43.
- 501 [38] L. V. Lee, B. Gerratana, W. W. Cleland, Substrate specificity and  
502 kinetic mechanism of escherichia coli ribulokinase, *Arch. Biochem. Bio-*  
503 *phys.* 396 (2001) 219–224.
- 504 [39] I. M. Keseler, A. Mackie, M. Peralta-Gil, A. Santos-Zavaleta, S. Gama-  
505 Castro, C. Bonavides-Martínez, C. Fulcher, A. M. Huerta, A. Kothari,



- 506 M. Krummenacker, M. Latendresse, L. Muñiz-Rascado, Q. Ong, S. Pa-  
507 ley, I. Schröder, A. G. Shearer, P. Subhraveti, M. Travers, D. Weeras-  
508 inghe, V. Weiss, J. Collado-Vides, R. P. Gunsalus, I. Paulsen, P. D.  
509 Karp, EcoCyc: fusing model organism databases with systems biology,  
510 *Nucleic Acids Res.* 41 (2013) D605–12.
- 511 [40] Z. A. King, J. Lu, A. Dräger, P. Miller, S. Federowicz, J. A. Lerman,  
512 A. Ebrahim, B. O. Palsson, N. E. Lewis, BiGG models: A platform  
513 for integrating, standardizing and sharing genome-scale models, *Nucleic*  
514 *Acids Res.* 44 (2016) D515–22.
- 515 [41] E. J. St Martin, R. P. Mortlock, A comparison of alternate metabolic  
516 strategies for the utilization of d-arabinose, *J. Mol. Evol.* 10 (1977)  
517 111–122.
- 518 [42] J. S. Rodríguez-Zavala, A. Allali-Hassani, H. Weiner, Characterization  
519 of *e. coli* tetrameric aldehyde dehydrogenases with atypical properties  
520 compared to other aldehyde dehydrogenases, *Protein Sci.* 15 (2006)  
521 1387–1396.
- 522 [43] M. Lässig, V. Mustonen, A. M. Walczak, Predicting evolution, *Nature*  
523 *Ecology & Evolution* 1 (2017) s41559–017–0077.
- 524 [44] G. C. Conant, K. H. Wolfe, Turning a hobby into a job: how duplicated  
525 genes find new functions, *Nat. Rev. Genet.* 9 (2008) 938–950.
- 526 [45] H. Innan, F. Kondrashov, The evolution of gene duplications: classifying  
527 and distinguishing between models, *Nat. Rev. Genet.* 11 (2010) 97–108.
- 528 [46] S. Ohno, *Evolution by Gene Duplication*, Springer-Verlag Berlin Heidel-  
529 berg, 1 edition, 1970.
- 530 [47] T. Sikosek, H. S. Chan, E. Bornberg-Bauer, Escape from adaptive con-  
531 flict follows from weak functional trade-offs and mutational robustness,  
532 *Proc. Natl. Acad. Sci. U. S. A.* 109 (2012) 14888–14893.
- 533 [48] D. L. Des Marais, M. D. Rausher, Escape from adaptive conflict after  
534 duplication in an anthocyanin pathway gene, *Nature* 454 (2008) 762–  
535 765.

- 536 [49] R. D. Finn, P. Coghill, R. Y. Eberhardt, S. R. Eddy, J. Mistry, A. L.  
537 Mitchell, S. C. Potter, M. Punta, M. Qureshi, A. Sangrador-Vegas, G. A.  
538 Salazar, J. Tate, A. Bateman, The pfam protein families database:  
539 towards a more sustainable future, *Nucleic Acids Res.* 44 (2016) D279–  
540 85.
- 541 [50] A. M. Huerta, J. Collado-Vides, Sigma70 promoters in escherichia coli:  
542 specific transcription in dense regions of overlapping promoter-like sig-  
543 nals, *J. Mol. Biol.* 333 (2003) 261–278.

Table 1: Key Innovative Mutations.

| Gene Mutated                | Substrate   | Gene Prediction | Protein Change(s) (Experiment #)                 | Perceived Impact (Structural (S) or Regulatory (R))                                                                                         |
|-----------------------------|-------------|-----------------|--------------------------------------------------|---------------------------------------------------------------------------------------------------------------------------------------------|
| <i>yihS</i>                 | D-Lyxose    | <i>yihS</i>     | R315S(1)<br>R315C(2)                             | Substrate binding <sup>1</sup> (S)<br>Substrate binding <sup>1</sup> (S)                                                                    |
| <i>yihW</i>                 | D-Lyxose    | <i>yihS</i>     | Frameshift(1)<br>I156S(2)                        | Loss of function, large truncation (R)<br>- (R)                                                                                             |
| <i>rbsK</i>                 | D-2-Deox.   | <i>rbsK</i>     | N20Y(1)                                          | - (S)                                                                                                                                       |
| <i>rbsR</i>                 | D-2-Deox.   | <i>rbsK</i>     | Insertion Sequence(1)                            | Loss of function, increased <i>rbsK</i> expression (R)                                                                                      |
| 181 kbp and 281 kbp Regions | D-2-Deox.   | <i>rbsK</i>     | Large Duplications(1)<br>165 and 262 genes       | Increased gene expression (R)                                                                                                               |
| <i>fucR</i>                 | D-Arabinose | <i>rbsK</i>     | D82Y(1)<br>S75R(1 and 2)<br>*244C(2)             | Pfam: DeoRC C terminal substrate sensor domain <sup>2</sup> (R)<br>Pfam: DeoRC C terminal substrate sensor domain <sup>2</sup> (R)<br>- (R) |
| <i>dmlA</i>                 | m-Tartrate  | <i>dmlA</i>     | A242T(1)                                         | - (S)                                                                                                                                       |
| <i>dmlR/dmlA</i>            | m-Tartrate  | <i>dmlA</i>     | intergenic -50/-53(2)<br>intergenic -35/-68(2)   | sigma 70 binding: -10 of dmlRp3 promoter <sup>3</sup> (R)<br>dmlRp3 promoter region <sup>3</sup> (R)                                        |
| <i>ybfF/seqA</i>            | Mon. Succ.  | <i>ybfF</i>     | intergenic -73/-112(1)<br>intergenic -51/-123(2) | sigma 24 binding: -35 of ybfFp1 promoter <sup>3</sup> (R)<br>sigma 24 binding: -10 of ybfFp1 promoter <sup>3</sup> (R)                      |

Substrates D-2-deoxyribose and monomethyl succinate are abbreviated D-2-Deox. and Mon. Succ. respectively. The detailed locations of the mutations listed in this table are available in Datasets S1. <sup>1</sup>Substrate binding information about YihS previously published[34]. <sup>2</sup>Protein family information listed in the Pfam database[49]. <sup>3</sup>Promoter/sigma factor binding regions found on EcoCyc[39] based on computational predictions[50].

Table 2: Optimizing Mutations.

| Gene Mutated   | Substrate             | Mutation Type                 | Proposed Impact                      | Associated with Underground Activity? |
|----------------|-----------------------|-------------------------------|--------------------------------------|---------------------------------------|
| <i>yihS</i>    | D-Lyxose              | V314L SNP                     | Improved D-Lyxose affinity           | Yes                                   |
| 131 kbp Region | D-Lyxose              | Large Duplication (129 genes) | Increased <i>xykB</i> expression     | No                                    |
| 183 kbp Region | D-2-Deoxyribose       | Large Deletion (171 genes)    | Decreased <i>aldA</i> expression     | Yes                                   |
| <i>araC</i>    | D-Arabinose           | 6 bp Deletion, SNP            | Increased <i>araB</i> expression     | Yes                                   |
| <i>ygbI</i>    | m-Tartrate            | 20 bp Deletion, SNP           | Increased <i>ygbJKLMN</i> expression | Maybe                                 |
| <i>pyrE</i>    | D-Lyxose*, m-Tartrate | Duplication*, Intergenic      | Increased <i>pyrE</i> expression     | No                                    |

\**pyrE* is located in the large region of duplication (second entry of the table).

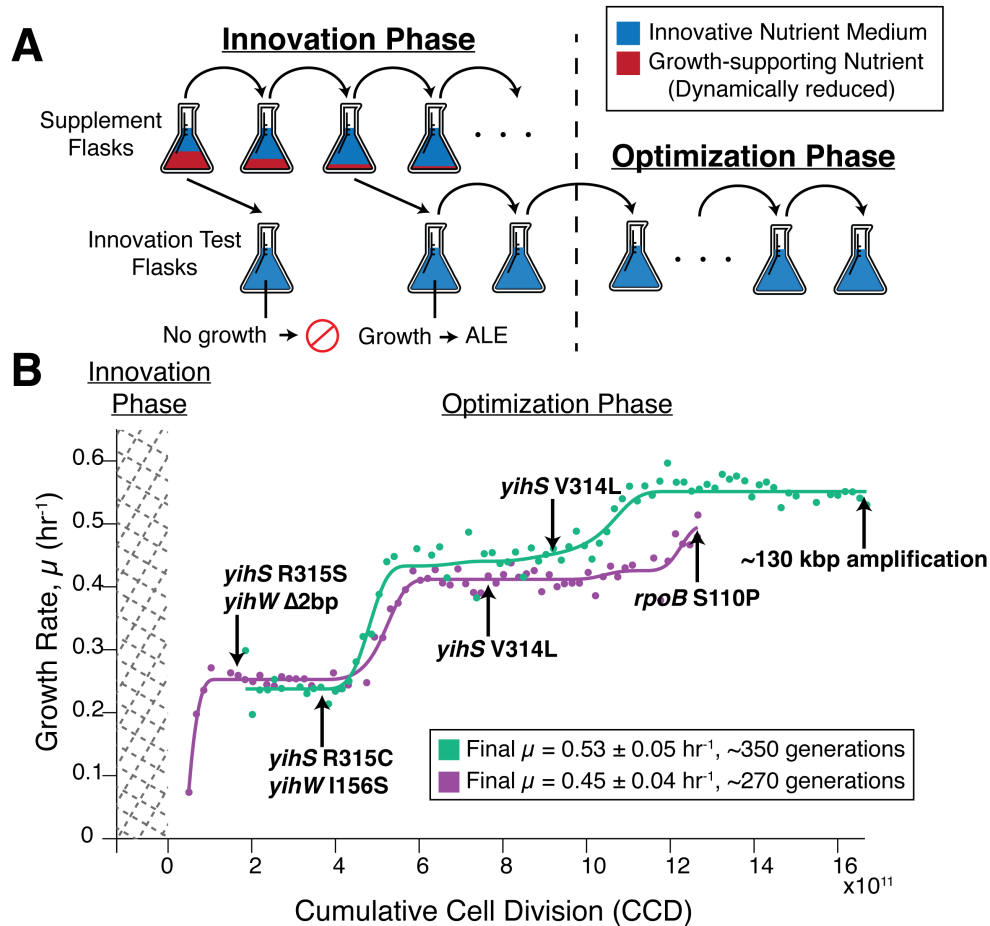

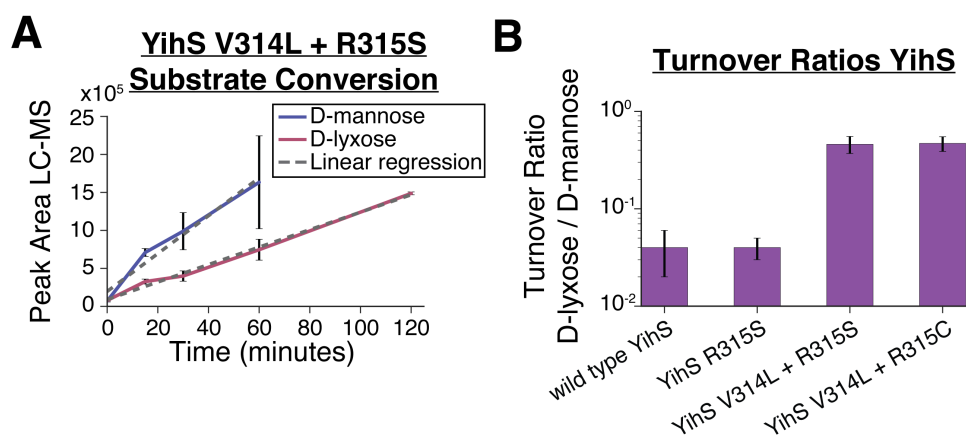

Figure 2: Evaluation of enzymatic activity for the wild-type and mutated promiscuous enzyme, YihS. A) YihS V314L + R315S mutant enzyme activity on D-mannose and D-lyxose. LC-MS was used to analyze YihS activity at saturating substrate concentrations to compare turnover rates on each substrate. Product formation was followed over time at a constant enzyme concentration. Turnover rates were calculated using linear regression. B) Turnover ratios of substrate conversion of D-lyxose / D-mannose are shown for the wild type YihS and mutant YihS enzymes. A ratio  $<1$  indicates a higher turnover rate on D-mannose compared to D-lyxose. Error bars represent standard error calculated from the linear regression analysis.

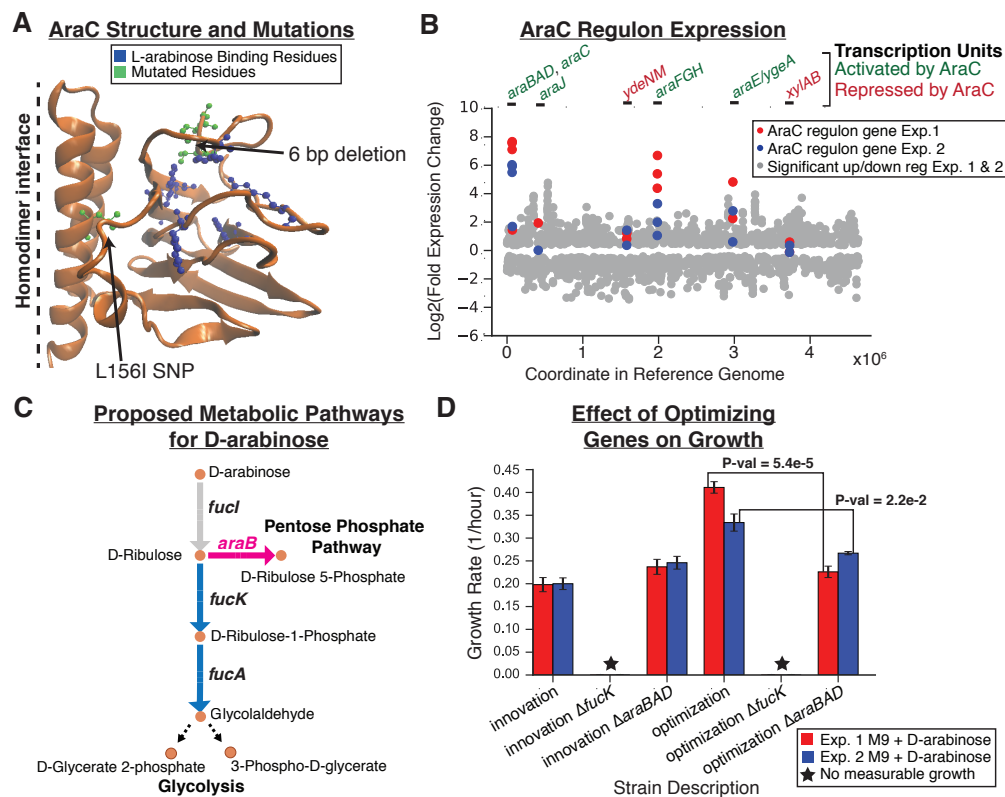

Figure 3: Optimization mutation analysis for D-arabinose evolution experiments. A) Structural mutations observed in sequencing data of Experiments (Exp.) 1 and 2 (green) as well as residues previously identified as important for binding L-arabinose (blue) are highlighted on one chain of the AraC homodimer protein structure. The six base pair deletion observed in Exp. 1 appears to be most clearly linked to affecting substrate binding. B) Expression data (RNAseq) for significantly differentially expressed genes ( $q$ -value  $< 0.05$ ). Scatter plot shows log<sub>2</sub>(fold change) of gene expression data comparing endpoint to initial populations for Exp. 1 and Exp. 2 (grey dots) with the location of the gene in the reference genome as the x-axis. Those genes that are associated with AraC transcription units are highlighted (red dots for Exp. 1 and blue dots for Exp. 2). Above the plot, the transcription units are labeled green if AraC activates expression (in the presence of arabinose) or red if AraC represses expression of those genes. C) The proposed two pathways for metabolizing D-arabinose. The pink pathway is enabled by the optimizing mutations observed in *araC*. D) Growth rate analysis of various innovation (starting point of optimization phase) and optimization (endpoint of optimization phase) strains with or without *fucK* or *araB* genes knocked out. Strains were grown on M9 minimal media with D-arabinose as the sole carbon source.

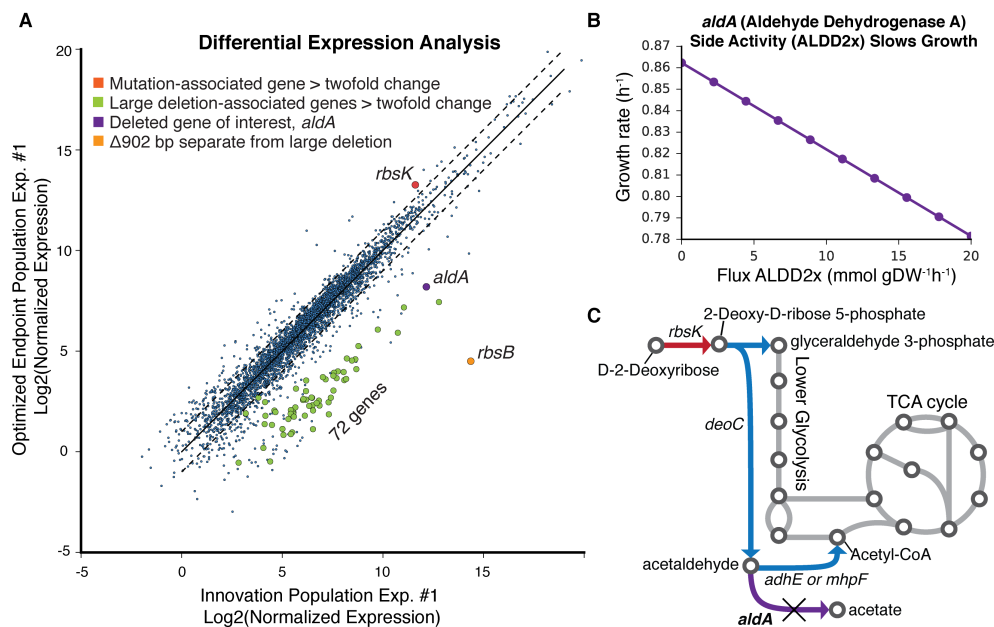

Figure 4: Optimization mutation analysis for the D-2-deoxyribose experiment. A) RNAseq expression data represented as log<sub>2</sub>(normalized expression) initial population samples compared to the endpoint population sample for experiment (Exp.) 1. Highlighted in red is *rbsK* associated with small mutation events and in green are genes associated with the large deletion. The *aldA* gene is highlighted in purple as a more highly expressed gene of interest that was within the large deletion region in the optimized endpoint population. The deleted genes have non-zero expression values in the optimized endpoint population, which can be explained by evidence that a fraction of the population does not contain the deletion (Fig. S9). B) A flux balance analysis plot showing the effect of flux through the reaction associated with *aldA* on growth rate. Flux through this reaction is predicted to have a negative effect on growth rate. C) A pathway map highlighting predicted pathways for metabolizing D-2-deoxyribose. Starting with D-2-deoxyribose in the upper left, the first reaction is catalyzed by the enzyme associated with the *rbsK* gene noted in red as it was a key gene mutated in the initial innovation population. The following reactions in blue are predicted to feed into lower glycolysis and the TCA cycle. The *aldA*-associated unfavorable underground reaction, converting acetaldehyde to acetate is highlighted in purple and marked with an X to note its deletion in an optimized endpoint population.
